# Supplementary material for: Iridium-based emitters containing pendant triphenylene moieties for bluish-green OLEDs with improved efficiency upon thermal annealing
Source: Royal Society of Chemistry journal article supplement (doi:10.1039/c6nj03692a), 2017-01-01
Supplement: c6nj03692a1.pdf [file c6nj03692a1.pdf]

## *Supporting Information*

### **Iridium-based Emitters Containing Pendant Triphenylene Moieties for Blue Green OLEDs with Improved Efficiency upon Thermal Annealing**

Yafei Wang<sup>†‡\*</sup>, Mengbing Zhu<sup>‡</sup>, Jiyong Deng<sup>△</sup>, Guohua Xie<sup>§\*</sup>, Etienne Baranoff<sup>†\*</sup>

<sup>†</sup>*School of Chemistry, University of Birmingham, Edgbaston, Birmingham, B15 2TT, UK*

<sup>‡</sup>*School of Materials Science & Engineering, Changzhou University, Changzhou 213164, P. R. China*

<sup>§</sup>*Department of Chemistry, Hubei Key Lab on Organic and Polymeric Optoelectronic Materials, Wuhan University, Wuhan 430072, People's Republic of China*

<sup>△</sup> *School of Chemistry and Chemical Engineering, Hunan Institute of Engineering, Xiangtan 411104, P.R. China*

#### ***Corresponding author***

Yafei Wang: [qiji830404@hotmail.com](mailto:qiji830404@hotmail.com)

Guohua Xie: [xgh-008@163.com](mailto:xgh-008@163.com)

Etienne Baranoff: [e.baranoff@bham.ac.uk](mailto:e.baranoff@bham.ac.uk)

#### **Contents**

**Figure S1.** TGA curves and DSC curves of YF-3 and YF-4

**Figure S2.** Luminescent images of YF3 and YF4 under UV light with 365 nm excitation

**Figure S3.** Figure PL profiles of YF-3 measured before and after annealing

**Figure S4.** CV curves of YF3 and YF4 measured in CH<sub>2</sub>Cl<sub>2</sub> with a scan rate of 100 mV/s

**Figure S5.** EQE-Current density curves of YF3 and YF4-based devices recorded at 10 V

**Figure S6.** Power efficiency-Current density curves of YF3 and YF4-based devices recorded at 10 V

***NMR spectra***

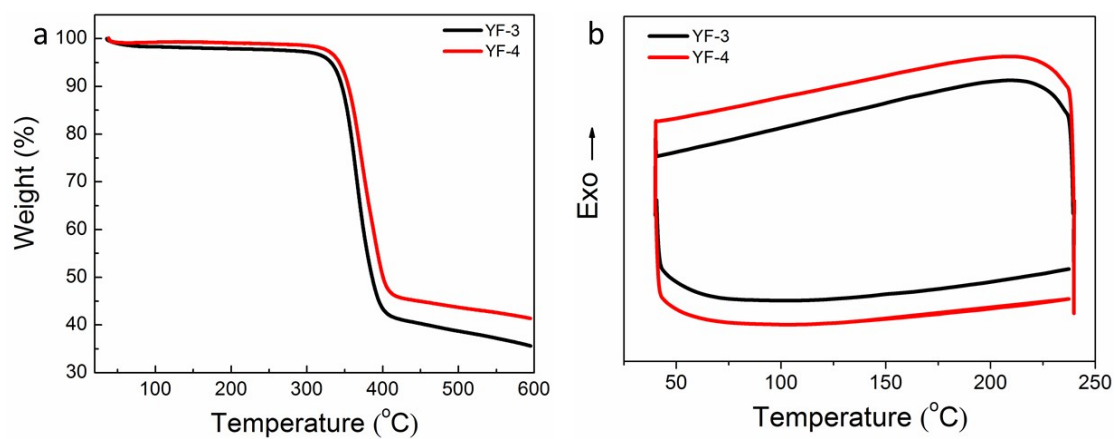

**Figure S1.** TGA curves (a) and DSC curves (b) of iridium complexes

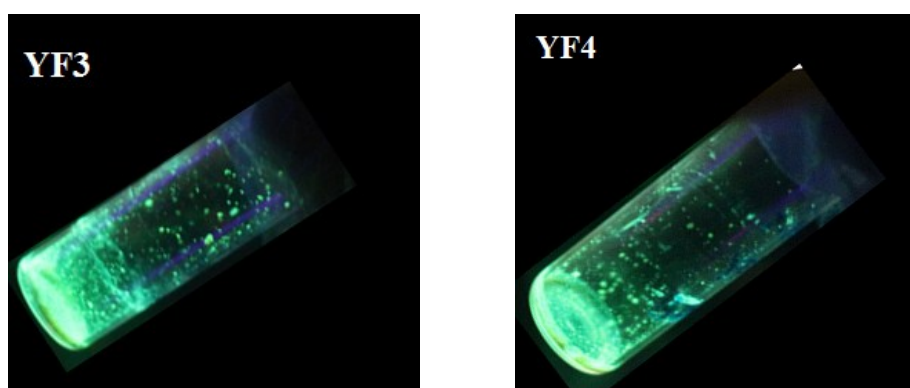

**Figure S2.** Luminescent images of YF3 and YF4 under UV light with 365 nm excitation

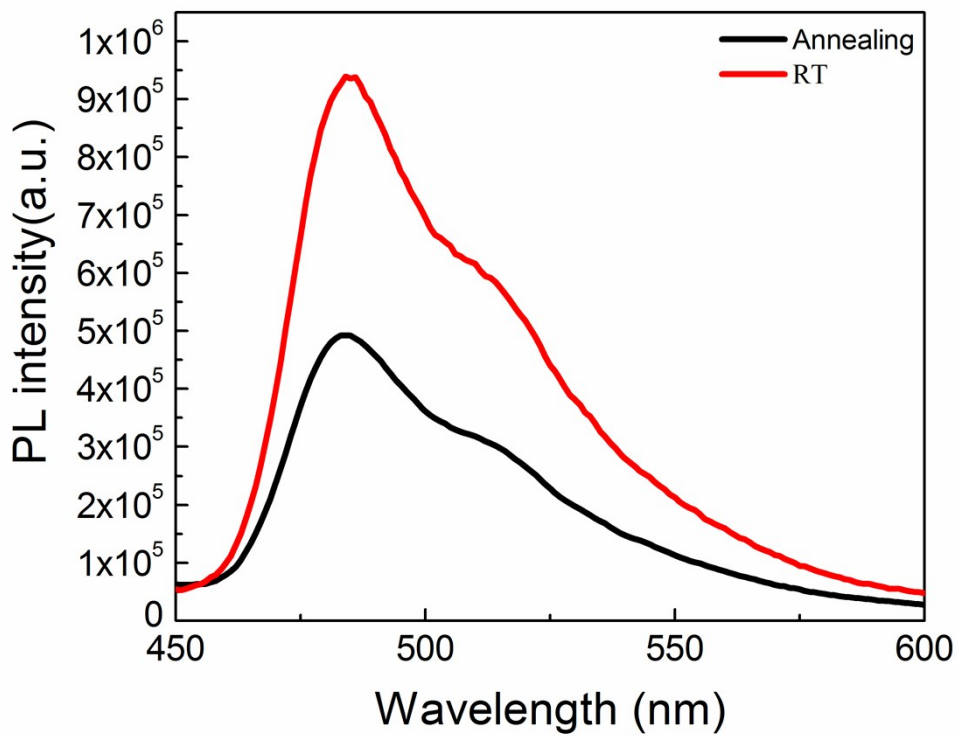

Figure S3. Figure PL profiles of YF-3 measured before and after annealing

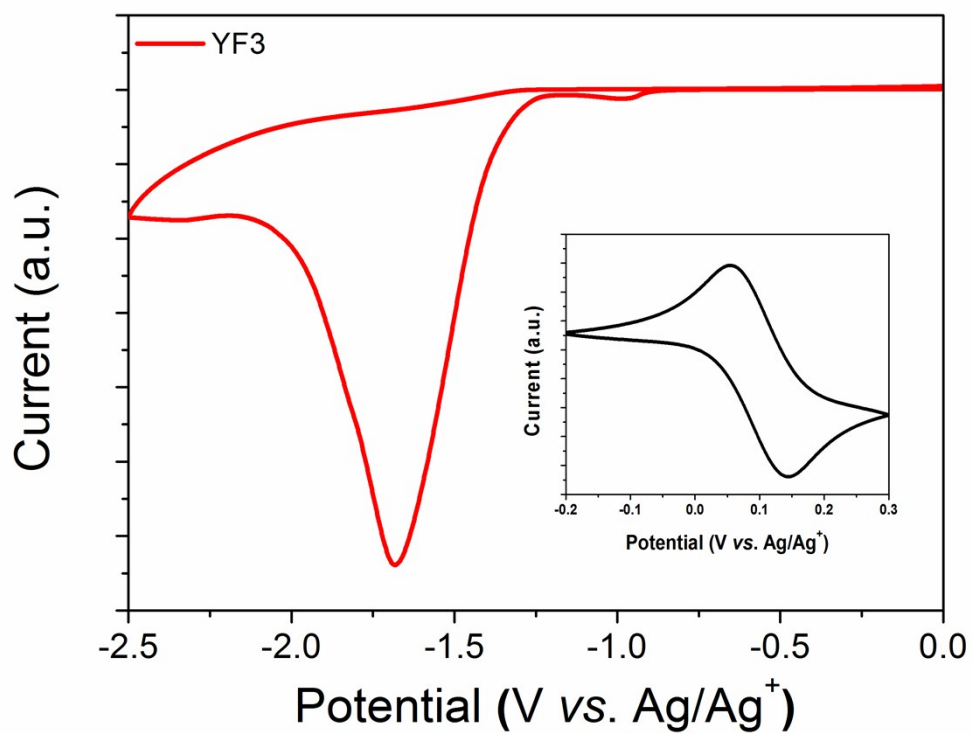

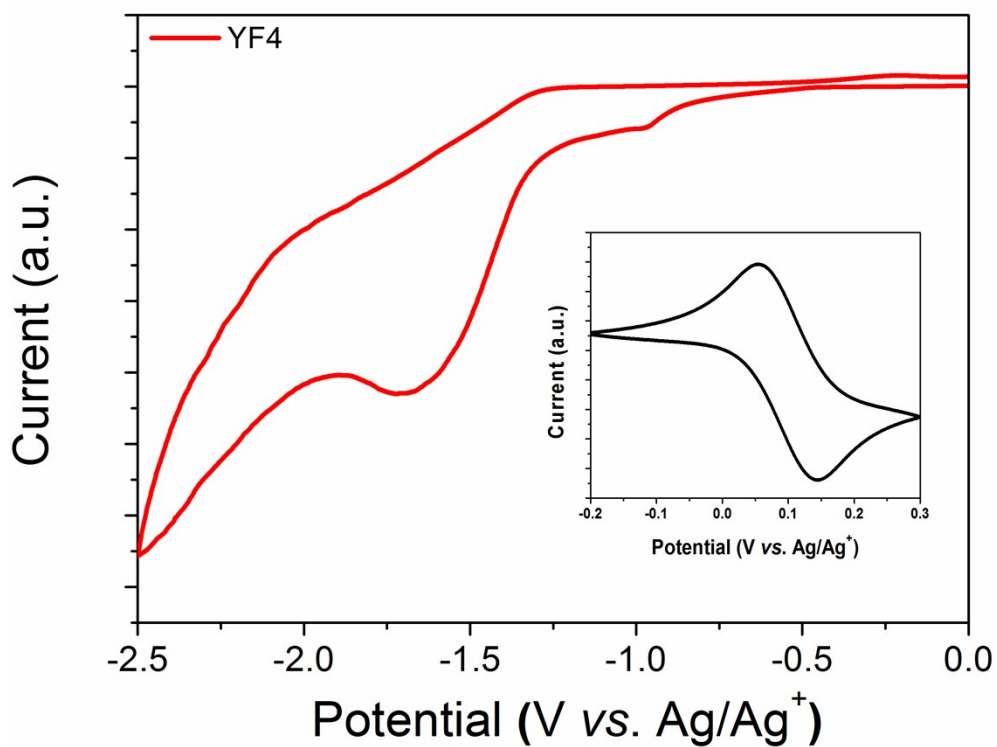

**Figure S4.** CV curves of YF3 and YF4 measured in  $\text{CH}_2\text{Cl}_2$  with a scan rate of 100 mV/s (inset: Fc/Fc<sup>+</sup> curve)

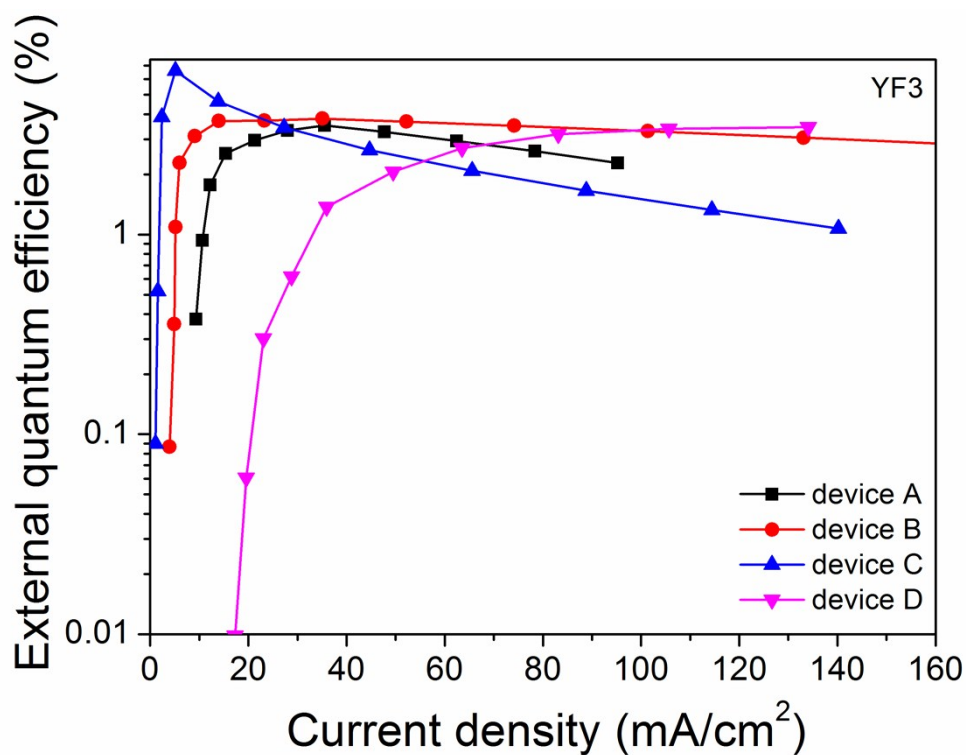

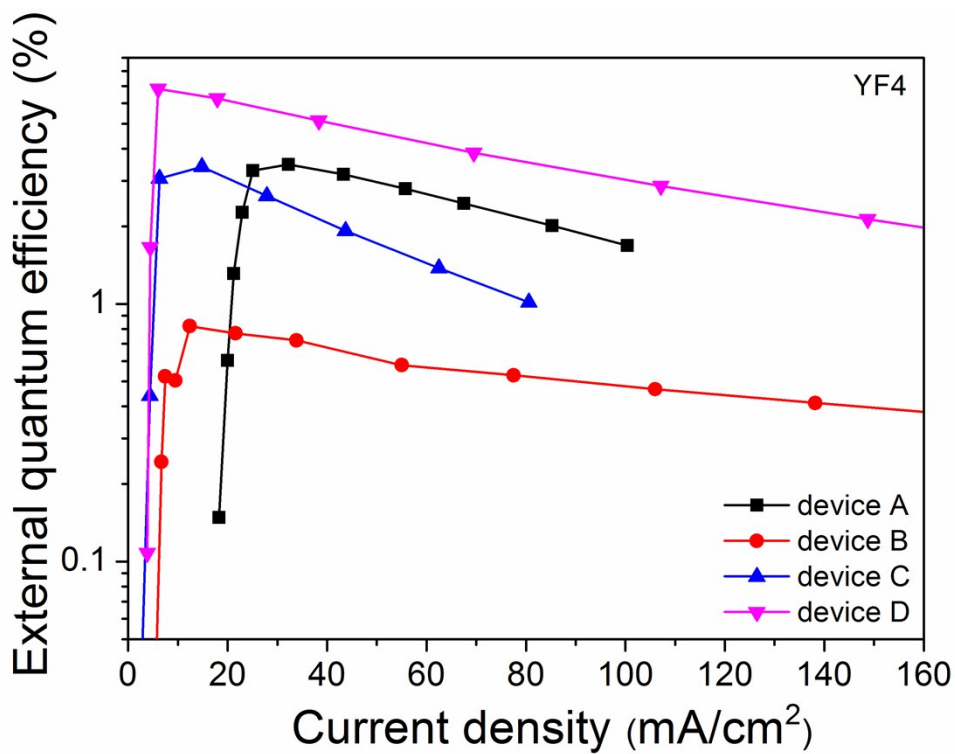

**Figure S5.** EQE-Current density curves of YF3 and YF4-based devices recorded at 10 V

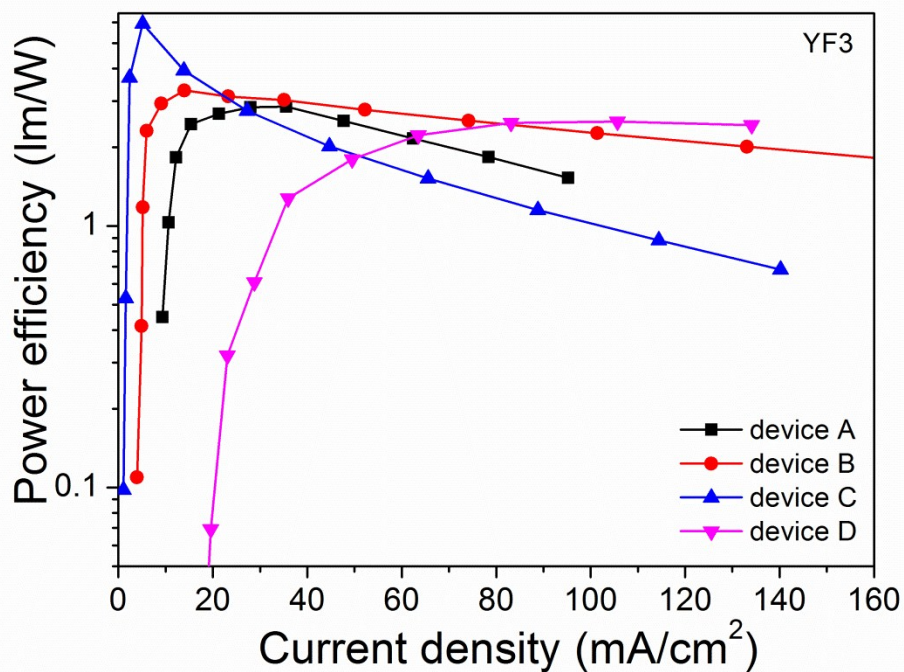

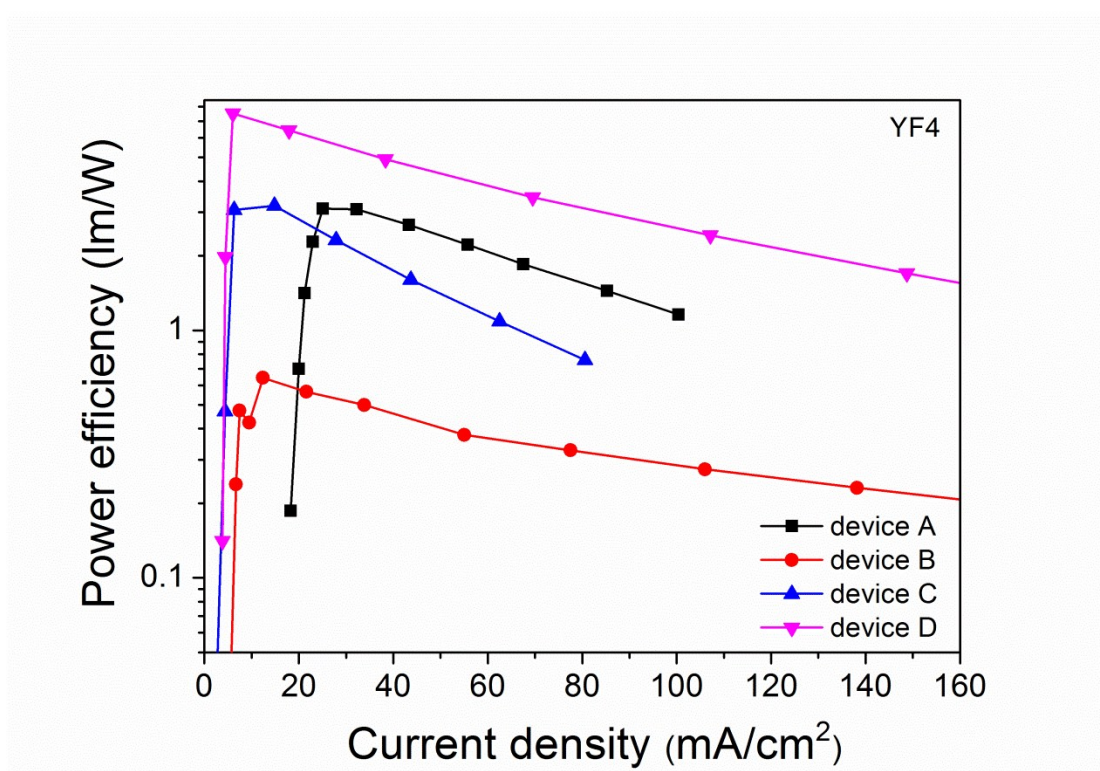

**Figure S6.** Power efficiency-Current density curves of YF3 and YF4-based devices recorded at 10 V

## NMR spectra

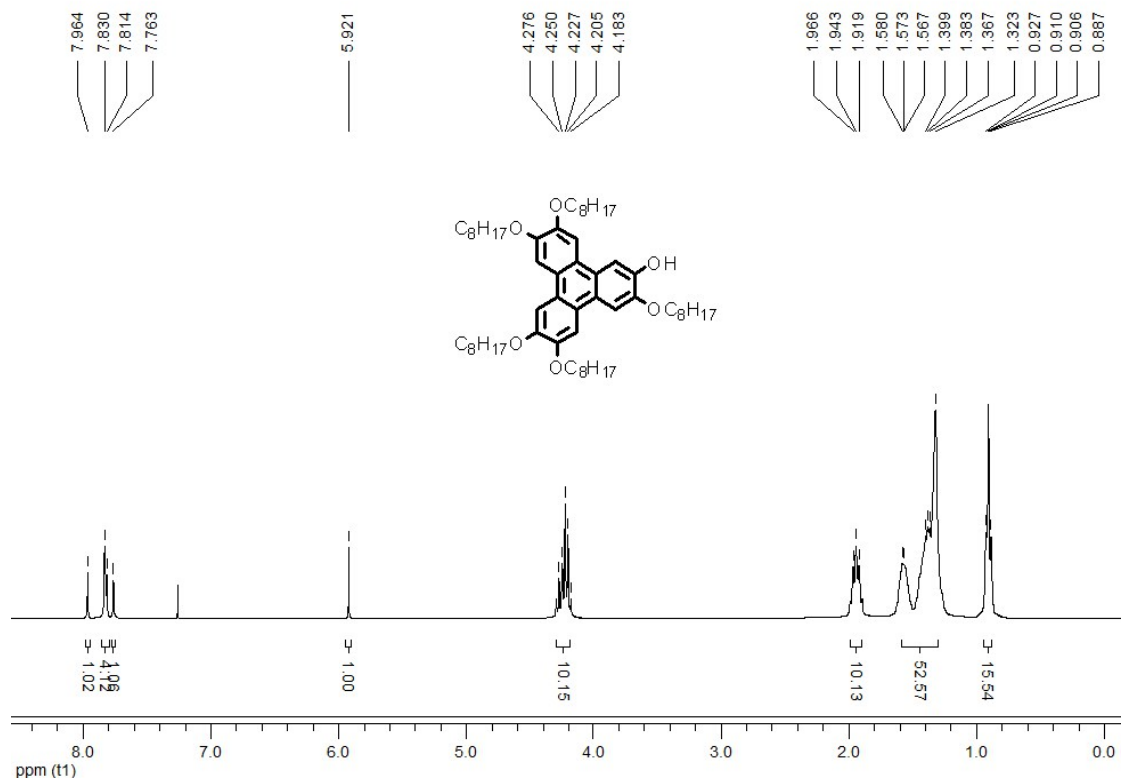

**<sup>1</sup>H NMR spectrum of compound 2**

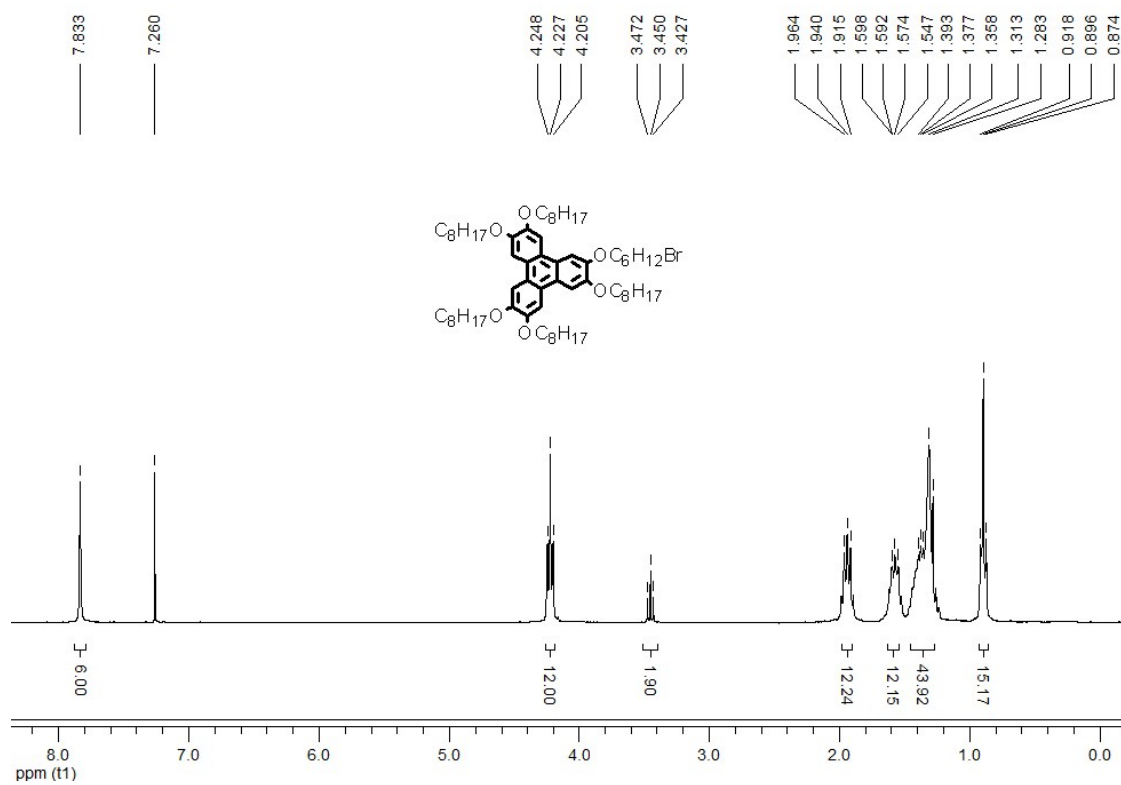

**<sup>1</sup>H NMR spectrum of compound 3**



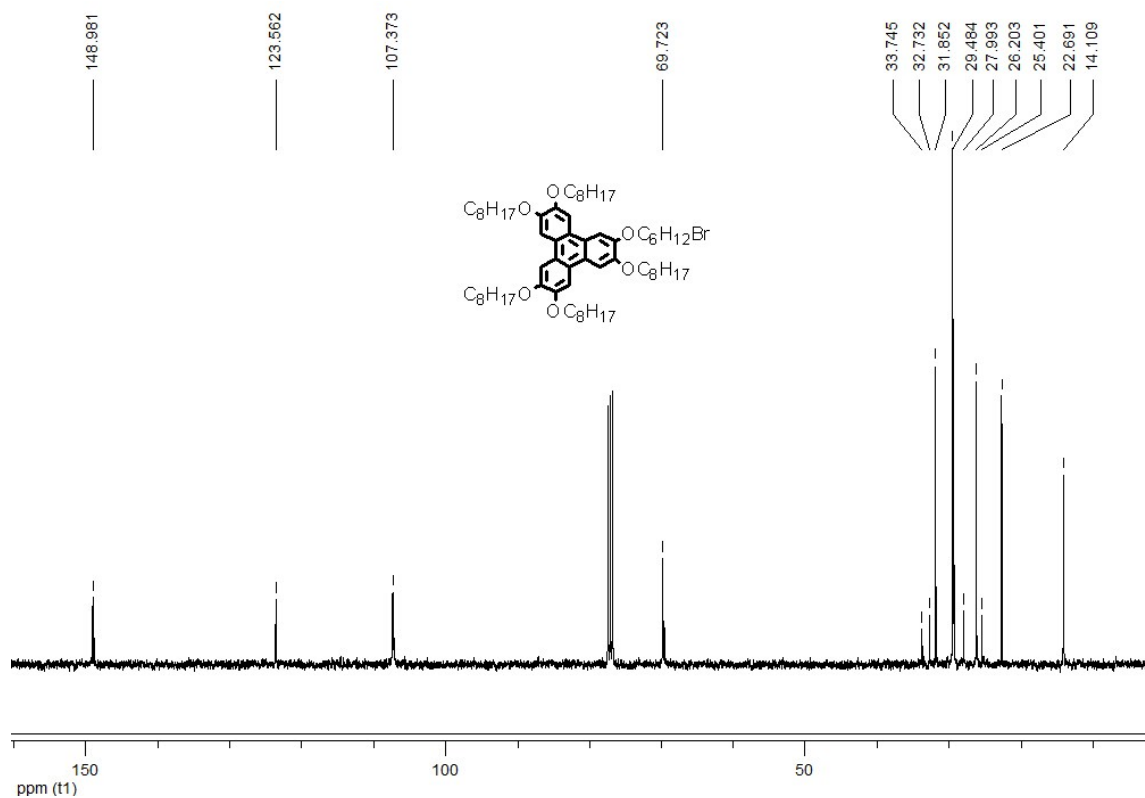

<sup>13</sup>C NMR spectrum of compound **3**

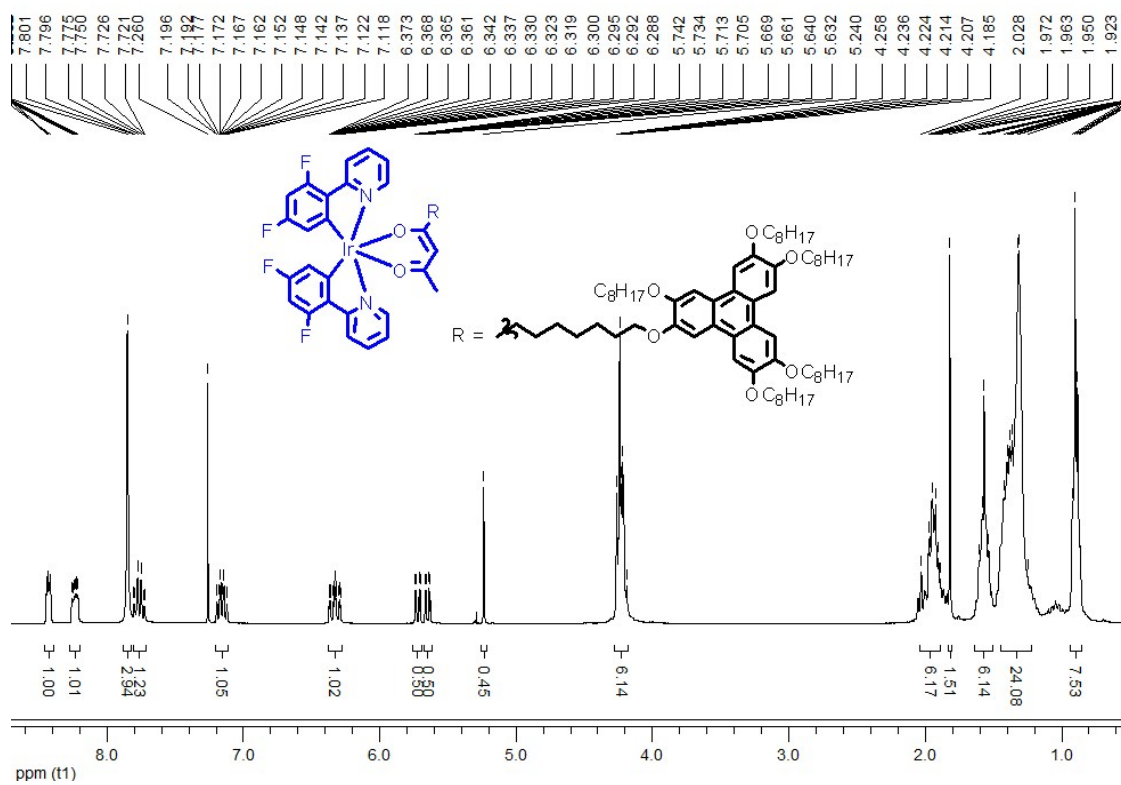

<sup>1</sup>H NMR spectrum of compound **YF3**



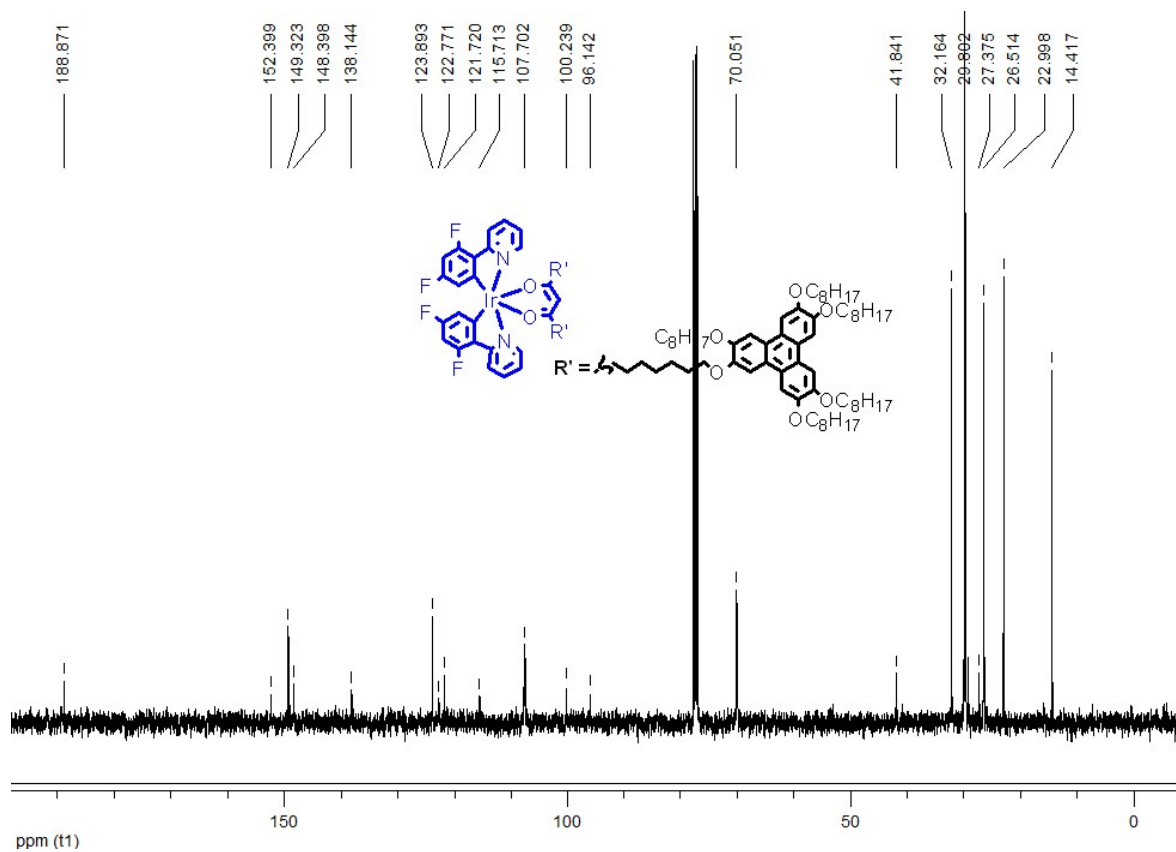

<sup>13</sup>C NMR spectrum of compound **IrYF4**
